# Supplementary material for: A functional topography within the cholinergic basal forebrain for encoding sensory cues and behavioral reinforcement outcomes
Source: eLife. 2021 Nov 25;10:e69514. doi: 10.7554/eLife.69514 (PMC8654357; doi:10.7554/eLife.69514)
Supplement: Figure 1—source data 1. [file elife-69514-fig1-data1.xlsx]

## Sheet: Sheet1
Cell counts, Figure 1D, Robert et al., bioRxiv 2021
HDB	ChAT+/GCaMP-	ChAT-/GCaMP+	ChAT+/GCaMP+			GP/SI	ChAT+/GCaMP-	ChAT-/GCaMP+	ChAT+/GCaMP+
Mouse1	15	14	209			Mouse1	14	17	170
Mouse2	26	9	115			Mouse2	10	17	158
Mouse3	115	28	574			Mouse3	23	11	261
Mouse4	77	44	493			Mouse4	14	3	66
TOTAL	233	95	1391	1486		TOTAL	61	48	655	703
CP-rostral	ChAT+/GCaMP-	ChAT-/GCaMP+	ChAT+/GCaMP+			CP-caudal	ChAT+/GCaMP-	ChAT-/GCaMP+	ChAT+/GCaMP+
Mouse1	149	31	28			Mouse1	20	5	1
Mouse2	142	8	18			Mouse2	34	2	5
Mouse3	721	20	40			Mouse3	115	9	21
Mouse4	569	70	26			Mouse4	26	2	12
TOTAL	1581	129	112	241		TOTAL	195	18	39	57
			12.4196	6.16598					16.7949	12.3333
